# Supplementary material for: Prediction of sustainable aviation fuel properties for liquid hydrocarbons from hydrotreating biomass catalytic fast pyrolysis derived organic intermediates
Source: Royal Society of Chemistry journal article supplement (doi:10.1039/d3se00058c), 2023-01-01
Supplement: d3se00058c1.xlsx [file d3se00058c1.xlsx]

## Sheet: CFP Compounds
List 1 - ZSM-5 CFP			List 2 - Pt/TiO2 CFP
Library ID	CAS #		Library ID	CAS #
Cyclohexane, methyl-	108-87-2		Cyclohexane, 1,2-dimethyl-, cis-	2207-01-4
Cyclohexane, 1,3-dimethyl-, cis-	638-04-0		Cyclohexane, ethyl-	1678-91-7
Cyclohexane, 1,2,3-trimethyl-, (1.alpha.,2.beta.,3.alpha.)-	1678-81-5		Octane, 2-methyl-	3221-61-2
Heptane, 2,4-dimethyl-	2213-23-2		Octane, 2-methyl-	3221-61-2
Cyclohexane, ethyl-	1678-91-7		Cyclohexane, 1,2,4-trimethyl-	2234-75-5
Octane, 2-methyl-	3221-61-2		Nonane	111-84-2
Cyclohexane, ethyl-	1678-91-7		Cyclohexane, 1,2,3-trimethyl-	1678-97-3
Cyclohexane, 1,2,4-trimethyl-, (1.alpha.,2.beta.,4.beta.)-	7667-60-9		Cyclohexane, 1-ethyl-2-methyl-	3728-54-9
Octane, 2,3-dimethyl-	7146-60-3		Pentalene, octahydro-	694-72-4
Cyclohexane, 1,2,4-trimethyl-	2234-75-5		Cyclohexane, 1-ethyl-4-methyl-, cis-	4926-78-7
Cyclohexane, 1,2,3-trimethyl-, (1.alpha.,2.beta.,3.alpha.)-	1678-81-5		Cyclohexane, 1-ethyl-4-methyl-, cis-	4926-78-7
Nonane	111-84-2		Cyclohexane, (1-methylethyl)-	696-29-7
Cyclohexane, 1,2,3-trimethyl-	1678-97-3		Cyclohexane, 1,2-diethyl-, cis-	824-43-1
Cyclohexane, 1-ethyl-4-methyl-, cis-	4926-78-7		Cyclohexane, propyl-	1678-92-8
Cyclohexane, 1-ethyl-4-methyl-, cis-	4926-78-7		Nonane, 2-methyl-	871-83-0
Cyclohexane, (1-methylethyl)-	696-29-7		Ethylbenzene	100-41-4
Octane, 4-ethyl-	15869-86-0		Benzene, 1,3-dimethyl-	108-38-3
Cyclohexane, propyl-	1678-92-8		Nonane, 3-methyl-	5911-04-6
Octane, 3,5-dimethyl-	15869-93-9		Cyclohexane, 1,2-diethyl-, cis-	824-43-1
Benzene, 1,3-dimethyl-	108-38-3		Cyclopentene, 1-butyl-	2423-01-0
Nonane, 3-methyl-	5911-04-6		1-Methyl-4-(1-methylethyl)-cyclohexane	99-82-1
Cyclohexane, 1-ethyl-1,3-dimethyl-, trans-	62238-29-3		o-Xylene	95-47-6
Bicyclo[2.2.1]heptane, 2-ethyl-	2146-41-0		Cyclohexane, 1-methyl-2-propyl-	4291-79-6
Cyclopentane, 1-methyl-3-(2-methylpropyl)-	29053-04-1		Decane	124-18-5
Decane	124-18-5		1H-Indene, octahydro-, cis-	4551-51-3
Cyclohexane, 1-methyl-2-propyl-	4291-79-6		Cyclohexane, 1-ethyl-1-methyl-	4926-90-3
1H-Indene, octahydro-, cis-	4551-51-3		Cyclohexene, 3-(1-methylethyl)-	3983-08-2
Cyclohexane, 1-ethyl-1-methyl-	4926-90-3		Cyclohexane, 1-ethyl-1-methyl-	4926-90-3
Pentalene, octahydro-2-methyl-	3868-64-2		Cyclohexane, 1,2-diethyl-, cis-	824-43-1
Cyclohexane, 1-ethyl-1-methyl-	4926-90-3		1H-Indene, octahydro-, cis-	4551-51-3
Cyclohexane, 1,2-diethyl-, cis-	824-43-1		Cyclopentane, 2-isopropyl-1,3-dimethyl-	32281-85-9
Cyclopentane, 2-isopropyl-1,3-dimethyl-	32281-85-9		Cyclohexane, 1-ethyl-2-methyl-, cis-	4923-77-7
1H-Indene, octahydro-, cis-	4551-51-3		Benzene, propyl-	103-65-1
Cyclohexane, 1-methyl-2-propyl-	4291-79-6		Cyclopentane, 1-methyl-3-(2-methyl-1-propenyl)-	75873-01-7
Benzene, propyl-	103-65-1		Cyclohexane, butyl-	1678-93-9
Cyclohexane, butyl-	1678-93-9		Cyclohexane, 2-ethyl-1,3-dimethyl-	7045-67-2
Cyclohexane, 2-ethyl-1,3-dimethyl-	7045-67-2		Benzene, 1-ethyl-4-methyl-	622-96-8
Benzene, 1-ethyl-4-methyl-	622-96-8		4,5-Nonadiene, 2-methyl-	55956-32-6
1,1'-Bicyclopentyl	1636-39-1		Cyclohexene, 1-butyl-	3282-53-9
Bicyclo[2.2.1]heptane, 2-ethyl-	2146-41-0		Benzene, 1-ethyl-2-methyl-	611-14-3
Bicyclo[5.3.0]decane (cis)	16189-46-1		2-Undecyne	60212-29-5
Cyclohexane, 1-ethyl-2-propyl-	62238-33-9		Bicyclo[2.2.1]heptane, 2-ethyl-	2146-41-0
Bicyclo[2.2.1]heptane, 2-ethyl-	2146-41-0		Cyclopentane, 1,2-dipropyl-	91242-57-8
Benzene, 1,2,3-trimethyl-	526-73-8		Benzene, 1,2,3-trimethyl-	526-73-8
Cyclopentane, 1-methyl-3-(2-methylpropyl)-	29053-04-1		Cyclohexane, 1-methyl-2-propyl-	4291-79-6
Cyclohexane, 1-ethyl-2-propyl-	62238-33-9		Naphthalene, decahydro-, trans-	493-02-7
Naphthalene, decahydro-, trans-	493-02-7		Cyclohexane, 1-ethyl-2-propyl-	62238-33-9
(2-Methylbutyl)cyclohexane	54105-77-0		(2-Methylbutyl)cyclohexane	54105-77-0
Cyclohexane, 1-ethyl-2-propyl-	62238-33-9		Benzene, 1-methyl-3-(1-methylethyl)-	535-77-3
cis-Decalin, 2-syn-methyl-	0-00-0		Cyclohexane, 1-ethyl-2-propyl-	62238-33-9
Benzene, 1-methyl-3-propyl-	1074-43-7		1-Methyl-2-methylenecyclohexane	2808-75-5
Naphthalene, decahydro-2-methyl-	2958-76-1		Naphthalene, decahydro-2-methyl-
Cyclohexane, pentyl-	4292-92-6		C12 Cycloalkane
Spiro[4.5]decane	176-63-6		Benzene, 1-methyl-3-propyl-	1074-43-7
Indane	496-11-7		Naphthalene, decahydro-2-methyl-	2958-76-1
1-Methyldecahydronaphthalene	2958-75-0		Benzene, butyl-	104-51-8
cis-Decalin, 2-syn-methyl-	0-00-0		Cyclohexane, butyl-	1678-93-9
Naphthalene, decahydro-2,6-dimethyl-	1618-22-0		Spiro[4.5]decane	176-63-6
Cyclohexane, 1-methyl-4-(1-methylbutyl)-	54411-00-6		Indane	496-11-7
Dodecane	112-40-3		Benzene, (1-methylpropyl)-	135-98-8
1H-Indene, 2,3-dihydro-2-methyl-	824-63-5		1-Methyldecahydronaphthalene	2958-75-0
Naphthalene, decahydro-2-methyl-	2958-76-1		cis-Decalin, 2-syn-methyl-	0-00-0
Cyclopentane, 1-methyl-3-(2-methylpropyl)-	29053-04-1		1,2-Dipropylcyclopropene	10306-92-0
cis-Decalin, 2-syn-methyl-	0-00-0		(2-Methylbutyl)cyclohexane	54105-77-0
Indan, 1-methyl-	767-58-8		2-Undecyne	60212-29-5
Naphthalene, decahydro-2-methyl-	2958-76-1		Tridecane	629-50-5
cis-Decalin, 2-syn-methyl-	0-00-0		Cyclopentane, 1-methyl-3-(2-methylpropyl)-	29053-04-1
1-Tridecene	2437-56-1	Not Matched	2-Undecyne	60212-29-5
cis-Decalin, 2-syn-methyl-	0-00-0		Cyclopentane, 1-methyl-3-(2-methylpropyl)-	29053-04-1
Cyclopentylcyclohexane	1606-08-2		Indan, 1-methyl-	767-58-8
Cyclohexane, hexyl-	4292-75-5		Naphthalene, decahydro-2-methyl-	2958-76-1
1H-Indene, 2,3-dihydro-4-methyl-	824-22-6		cis-Decalin, 2-syn-methyl-	0-00-0
Naphthalene, 2-ethyldecahydro-	1618-23-1		Naphthalene, 2-ethyldecahydro-
Naphthalene, 2-ethyldecahydro-	1618-23-1		Cyclohexane, (2-methylpropyl)-	1678-98-4
1H-Indene, 2,3-dihydro-4-methyl-	824-22-6		2-Undecyne	60212-29-5
Spiro[5.6]dodecane	181-15-7		2-Undecyne	60212-29-5
1H-Indene, 2,3-dihydro-4-methyl-	824-22-6		Cyclopentylcyclohexane	1606-08-2
Naphthalene, 1,2,3,4-tetrahydro-	119-64-2		5-Dodecyne	19780-12-2
1H-Indene, 2,3-dihydro-1,3-dimethyl-	4175-53-5		Cyclohexane, hexyl-	4292-75-5
Cyclopentane, 1-methyl-2-(2-propenyl)-, trans-	50746-53-7		1H-Indene, 2,3-dihydro-4-methyl-	824-22-6
1,1'-Bicyclohexyl	92-51-3		Naphthalene, 2-ethyldecahydro-	1618-23-1
Bicyclo[3.1.1]heptane, 2,6,6-trimethyl-	473-55-2		Naphthalene, 2-ethyldecahydro-	1618-23-1
1H-Indene, 2,3-dihydro-4,7-dimethyl-	6682-71-9		1H-Indene, 2,3-dihydro-4-methyl-	824-22-6
Perhydrophenalene, (3a.alpha., 6a.alpha., 9a.alpha., 9b.beta.)-	40250-64-4		Naphthalene, 1,2,3,4-tetrahydro-	119-64-2
			1H-Indene, 2,3-dihydro-1,3-dimethyl-	4175-53-5
			Cyclopentane, 1-methyl-2-(2-propenyl)-, trans-	50746-53-7
			1,1'-Bicyclohexyl	92-51-3
			Bicyclo[3.1.1]heptane, 2,6,6-trimethyl-	473-55-2
			Naphthalene, 1,2,3,4-tetrahydro-5-methyl-	2809-64-5
			Perhydrophenalene, (3a.alpha., 6a.alpha., 9a.alpha., 9b.beta.)-	40250-64-4
			Cyclohexane, 1,1'-(1,2-ethanediyl)bis-	3321-50-4

## Sheet: Table S4
	Table S4. Selected pure component properties for compounds found in ZSM-5 and Pt/TiO2 hydrogenated CFP Jet fractions obtained from GC×GC-MS/FID.
				M	NBP	Source	Density	Source	Flash pt	Source	Tfus	NHC	Source	Tc	Source	Pc	Source
	Compound name	CAS #	Formula	g mol-1	deg. C		kg m-3		deg. C		deg. C	MJ kg-1		deg. C		kPa
	Cyclohexane, methyl-	108-87-2	C7H14	98.1859	100.89		773.64		-4.95		-126.56	-43.358		299.16		3481
	Cyclohexane, 1,3-dimethyl-, cis-	638-04-0	C8H16	112.212	124.43		772.299		10.75		-75.51	-43.309		313.17		2832	AW
	Cyclohexane, ethyl-	1678-91-7	C8H16	112.212	131.77		792.149		16.35		-111.29	-43.4048		332.95		3110
	Benzene, 1,3-dimethyl-	108-38-3	C8H10	106.165	139.08		868.401		26.35		-47.85	-40.8031		343.74	REFPROP	3535	REFPROP
	Cyclohexane, 1,2-dimethyl-, cis-	2207-01-4	C8H16	112.212	129.69		800.62		14.05		-49.832	-43.4078		334.14		3277	AW
	Ethylbenzene	100-41-4	C8H10	106.165	136.17		871.97		23.95		-94.95	-40.9135		343.97	REFPROP	3622	REFPROP
	o-Xylene	95-47-6	C8H10	106.165	144.39		883.89		30.15		-25.165	-40.8112		357.11	REFPROP	3738	REFPROP
	Pentalene, octahydro-	694-72-4	C8H14	110.196	137.85	AW	873.7		19.35	Estd. Psat	-49.05	-42.6962	Estimated 4	361.85	QSPR	3772	QSPR
	Cyclohexane, 1-ethyl-2-methyl-	3728-54-9	C9H18	126.239	153.85	AW	808	Estimated	28.75	Estd. Psat		-43.3925	Estimated 5	357.85	Marrero-Pardillo	2814	Wilson-Jasperson
	Cyclohexane, 1-ethyl-2-methyl-, cis-	4923-77-7	C9H18	126.239	155.85	AW	813.4	Estimated	30.65	Estd. Psat		-43.4242		360.85	Marrero-Pardillo	2831	Wilson-Jasperson
	Cyclohexane, 1,2,3-trimethyl-, (1.alpha.,2.beta.,3.alpha.)-	1678-81-5	C9H18	126.239	144.08	AW	791	Estimated	25.25	Estd. Psat	-85	-43.2642	Estimated	334.85	Wilson-Jasperson	2684	Joback
	Heptane, 2,4-dimethyl-	2213-23-2	C9H20	128.255	132.77	AW	718.703		16.45	Estd. Psat		-44.2778	Estimated	303.85	Joback	2358	Marrero-Pardillo
	Octane, 2-methyl-	3221-61-2	C9H20	128.255	142.97	AW	718.71		27.35	Estd. Psat	-80.31	-44.2719		309.68		2302
	Cyclohexane, 1,2,4-trimethyl-, (1.alpha.,2.beta.,4.beta.)-	7667-60-9	C9H18	126.239	142.34	AW	789.5	Estimated	22.65	Estd. Psat	-85	-43.2713	Estimated	328.85	Wilson-Jasperson	2651	Joback
	Cyclohexane, 1,2,4-trimethyl-	2234-75-5	C9H18	126.239	142.48	AW	791	Estimated	20.95	Estd. Psat	-86.36	-43.2753	Estimated	327.85	Wilson-Jasperson	2658	Joback
	Nonane	111-84-2	C9H20	128.255	150.65		721.83		32.15		-53.45	-44.3236		321.4	REFPROP	2281	REFPROP
	Cyclohexane, 1,2,3-trimethyl-	1678-97-3	C9H18	126.239	151.08	AW	796.1	Estimated	29.25	Estd. Psat		-43.2618	Estimated	342.85	Wilson-Jasperson	2649	Joback
	Cyclohexane, 1-ethyl-4-methyl-, cis-	4926-78-7	C9H18	126.239	150.38	AW	800.6	Estimated	26.95	Estd. Psat		-43.4021		350.85	Marrero-Pardillo	2784	Wilson-Jasperson
	Cyclohexane, (1-methylethyl)-	696-29-7	C9H18	126.239	154.47		805.87		29.45		-90	-43.3098		362.15		2940
	Cyclohexane, propyl-	1678-92-8	C9H18	126.239	156.7		797.47		33.75		-94.86	-43.4101		357.65		2850
	Bicyclo[2.2.1]heptane, 2-ethyl-	2146-41-0	C9H16	124.223	152.31	AW	860.1	Estimated	27.65	Estd. Psat		-42.9687	Estimated	366.85	Wilson-Jasperson	3294	Wilson-Jasperson
	1H-Indene, octahydro-, cis-	4551-51-3	C9H16	124.223	167.84		888.35		41.45		-36.71	-42.6898		388.85	Joback	3311	AW
	Cyclohexane, 1-ethyl-1-methyl-	4926-90-3	C9H18	126.239	151.92	AW	810.1	Estimated	27.65	Estd. Psat		-43.3925		359.85	Joback	2980	Joback
	Pentalene, octahydro-2-methyl-	3868-64-2	C9H16	124.223	147.85	AW/NRRC	893.6	Estimated	25.85	Estd. Psat		-42.7554	Estimated 6	359.85	Wilson-Jasperson	3239	Wilson-Jasperson
	Benzene, propyl-	103-65-1	C9H12	120.191	159.224		866.33		38.95		-99.52	-41.2195		365.14		3200
	Benzene, 1-ethyl-4-methyl-	622-96-8	C9H12	120.191	161.984		866.07		41.65		-62.88	-41.1241		367.057		3234
	Benzene, 1,2,3-trimethyl-	526-73-8	C9H12	120.191	176.08		898.356		52.55		-25.32	-41.0513		391.27		3453
	Indane	496-11-7	C9H10	118.175	177.81		965.08		53.35		-51.364	-40.2978		411.7		3986
	Benzene, 1-ethyl-2-methyl-	611-14-3	C9H12	120.191	165.15		885.053		44.05		-81.15	-41.1523		372.85	Marrero-Pardillo	3203	AW
	Octane, 4-ethyl-	15869-86-0	C10H22	142.281	163.36	AW	741.9	Estimated	40.85	Estd. Psat		-44.2453	Estimated	333.85	QSPR	2220	QSPR
	Octane, 2,3-dimethyl-	7146-60-3	C10H22	142.281	164.26	AW	741.5	Estimated	40.15	Estd. Psat		-44.2081	Estimated	337.85	Joback	2211	Marrero-Pardillo
	Octane, 3,5-dimethyl-	15869-93-9	C10H22	142.281	158.25	AW	717.6	Estimated	35.65	Estd. Psat		-44.2165	Estimated	330.85	Joback	2160	Marrero-Pardillo
	Nonane, 3-methyl-	5911-04-6	C10H22	142.281	167.42	AW	736.87		51.95	Estd. Psat	-154.6	-44.2158	Estimated	340.85	QSPR	2061	QSPR
	Cyclohexane, 1-ethyl-1,3-dimethyl-, trans-	62238-29-3	C10H20	140.266	162.85	Estimated; AW/CG	805.5	Estimated	31.45	Estd. Psat		-43.3197	Estimated	363.85	Joback	2501	Wilson-Jasperson
	Cyclopentane, 1-methyl-3-(2-methylpropyl)-	29053-04-1	C10H20	140.266	158.85	Estimated; AW/CG	808.5	Estimated	32.35	Estd. Psat		-43.4994	Estimated	349.85	Joback	2443	Joback
	Decane	124-18-5	C10H22	142.281	174.055		734.41		48.65		-29.614	-44.2374		344.55	REFPROP	2103	REFPROP
	Cyclohexane, 1-methyl-2-propyl-	4291-79-6	C10H20	140.266	176.85	Estimated; AW	813.2	Estimated	47.85	Estd. Psat		-43.3247	Estimated	376.85	Marrero-Pardillo	2533	Wilson-Jasperson
	Cyclohexane, 1,2-diethyl-, cis-	824-43-1	C10H20	140.266	171.85	Estimated; AW/CG	808	Estimated	36.75	Estd. Psat		-43.3411	Estimated	382.85	CG	2577	Wilson-Jasperson
	Cyclopentane, 2-isopropyl-1,3-dimethyl-	32281-85-9	C10H20	140.266	157.85	Estimated; AW/NRRC	808.1	Estimated	30.25	Estd. Psat		-43.4167	Estimated	346.85	CG	2366	Joback
	Cyclohexane, butyl-	1678-93-9	C10H20	140.266	180.9		803.206		50.75		-74.685	-43.4195		376.15		2523
	Cyclohexane, 2-ethyl-1,3-dimethyl-	7045-67-2	C10H20	140.266	161.85	Estimated; AW/CG	804.3	Estimated	28.85	Estd. Psat		-43.3104	Estimated	365.85	CG	2405	Joback
	1,1'-Bicyclopentyl	1636-39-1	C10H18	138.25	190.46		868.24		56.55		-35.33	-42.9149		416.85		3235	AW
	Bicyclo[5.3.0]decane (cis)	16189-46-1	C10H18	138.25	178.85	Estimated; AW/CG	887	Estimated	39.25	Estd. Psat		-42.9089	Estimated	417.85	QSPR	3053	QSPR
	Naphthalene, decahydro-, trans-	493-02-7	C10H18	138.25	187.264		873.519		52.25		-30.35	-42.5417		413.87		3138
	Spiro[4.5]decane	176-63-6	C10H18	138.25	187.68		881.978		52.25			-42.7592		412.85	Joback	3013	AW
	Bicyclo[3.1.1]heptane, 2,6,6-trimethyl-	473-55-2	C10H18	138.25	167	AW	859.12	Estimated	37.35	Estd. Psat	-80.04	-43.4847	Estimated	377.85	Wilson-Jasperson	2751	Joback
	Benzene, 1-methyl-3-propyl-	1074-43-7	C10H14	134.218	182.07	AW	865.3	Estimated	55.85	Estd. Psat	-82.53	-41.3588		381.85	Marrero-Pardillo	2838	Wilson-Jasperson
	1H-Indene, 2,3-dihydro-2-methyl-	824-63-5	C10H12	132.202	191.85	AW	942.4	Estimated	61.95	Estd. Psat		-40.5801	Estimated	415.85	Marrero-Pardillo	3410	Wilson-Jasperson
	Indan, 1-methyl-	767-58-8	C10H12	132.202	190.85	AW	944.1	Estimated	59.85	Estd. Psat		-40.5884	Estimated	422.85	QSPR	3554	QSPR
	1H-Indene, 2,3-dihydro-4-methyl-	824-22-6	C10H12	132.202	206.37	AW	964	Estimated	76.85	Estd. Psat		-40.506	Estimated	433.85	QSPR	3682	QSPR
	Naphthalene, 1,2,3,4-tetrahydro-	119-64-2	C10H12	132.202	207.165		973.14		72.95		-35.76	-40.5213		447.13		3520
	Benzene, 1-methyl-3-(1-methylethyl)-	535-77-3	C10H14	134.218	175.03	AW	864.8		49.35	Estd. Psat	-63.73	-41.3409		378.85	Wilson-Jasperson	3059	AW
	Benzene, (1-methylpropyl)-	135-98-8	C10H14	134.218	173.29		866.07		46.95		-75.18	-41.4363		379.85		3035
	Benzene, butyl-	104-51-8	C10H14	134.218	183.27		864.34		55.45		-87.81	-41.4575		387.295		2886
	9-Methylbicyclo[3.3.1]nonane	25107-01-1	C10H18	138.25	188.85	Estimated; AW/NRRC	903	Estimated	55.45	Estd. Psat		-42.7382	Estimated 3	406.85	Wilson-Jasperson	3024	Wilson-Jasperson
	1-Methyl-4-(1-methylethyl)-cyclohexane	99-82-1	C10H20	140.266	171.2	AW	803.6	Estimated	39.95	Estd. Psat	-117.98	-43.2848	Estimated	377.85	Marrero-Pardillo	2630	Wilson-Jasperson
	Cyclohexane, (2-methylpropyl)-	1678-98-4	C10H20	140.266	171.309		799		42.55			-43.3589	Estimated	368.95		2615	AW
	Nonane, 2-methyl-	871-83-0	C10H22	142.281	166.85	AW	730.83		46.05	Estd. Psat	-74.305	-44.1757		328.85	QSPR	2099	QSPR
	Cyclohexane, 1-ethyl-2-propyl-	62238-33-9	C11H22	154.292	196.88	AW	821.7	Estimated	57.85	Estd. Psat		-43.3399	Estimated	398.85	CG	2348	Wilson-Jasperson
	(2-Methylbutyl)cyclohexane	54105-77-0	C11H22	154.292	190.85	Estimated; AW/CG	823	Estimated	53.55	Estd. Psat		-43.3943	Estimated	389.85	CG	2314	Wilson-Jasperson
	Cyclopentane, 1,2-dipropyl-	91242-57-8	C11H22	154.292	191.85	Estimated; AW/CG	829	Estimated	57.25	Estd. Psat		-43.5012	Estimated	380.85	Joback	2210	Joback
	cis-Decalin, 2-syn-methyl-	14398-72-2	C11H20	152.276	201.85	Estimated; AW/NRRC	899	Estimated	61.15	Estd. Psat		-42.6388	Estimated	419.85	Joback	2638	Joback
	Naphthalene, decahydro-2-methyl-	2958-76-1	C11H20	152.276	201.85	AW	873.5	Estimated	60.95	Estd. Psat		-42.6388	Estimated 7	418.85	Joback	2651	Joback
	Cyclohexane, pentyl-	4292-92-6	C11H22	154.292	203.507		807.14		66.45			-43.3969	Estimated	400.85	Joback	2394	AW
	1-Methyldecahydronaphthalene	2958-75-0	C11H20	152.276	205.01	AW	886.8	Estimated	63.15	Estd. Psat		-42.6598		423.85	Joback	2638	Joback
	Cyclopentylcyclohexane	1606-08-2	C11H20	152.276	214.78	AW	879	Estimated	71.35	Estd. Psat		-42.7951		443.85	Joback	2832	Wilson-Jasperson
	1H-Indene, 2,3-dihydro-1,3-dimethyl-	4175-53-5	C11H14	146.228	203.43	AW	932.7	Estimated	65.95	Estd. Psat		-40.8599	Estimated 2	433.85	QSPR	3172	QSPR
	1H-Indene, 2,3-dihydro-4,7-dimethyl-	6682-71-9	C11H14	146.228	227.69		953.3	Estimated	87.85		-0.515	-40.7285		452.85	QSPR	2994	AW
	Naphthalene, 1,2,3,4-tetrahydro-5-methyl-	2809-64-5	C11H14	146.228	234.22	AW	974.7	Estimated	91.85	Estd. Psat	-23.032	-40.7253		469.85	Marrero-Pardillo	3208	Wilson-Jasperson
	Naphthalene, decahydro-2,6-dimethyl-	1618-22-0	C12H22	166.303	208.01	AW	874.46	Estimated	64.55	Estd. Psat		-42.7215	Estimated 1	416.85	Joback	2403	Wilson-Jasperson
	Cyclohexane, 1-methyl-4-(1-methylbutyl)-	54411-00-6	C12H24	168.319	202.85	Estimated; AW/CG	827.4	Estimated	59.25	Estd. Psat		-43.3608	Estimated	399.85	CG	2106	Wilson-Jasperson
	Dodecane	112-40-3	C12H26	170.335	216.285		752.83		78.55		-9.55	-44.121		384.95	REFPROP	1817	REFPROP
	Cyclohexane, hexyl-	4292-75-5	C12H24	168.319	224.85		811.51		81.75		-47.47	-43.4018		417.85	Joback	2165	AW
	Naphthalene, 2-ethyldecahydro-	1618-23-1	C12H22	166.303	220.85	Estimated; AW	875.7	Estimated	72.45	Estd. Psat		-42.739	Estimated	431.85	Joback	2398	Joback
	Spiro[5.6]dodecane	181-15-7	C12H22	166.303	240.85	Estimated; AW	906.58		88.35	Estd. Psat		-42.8721		464.85	QSPR	3186	QSPR
	1,1'-Bicyclohexyl	92-51-3	C12H22	166.303	237.764		890.075		88.95		3.7	-42.7457		468.85	Joback	2867	AW
	Cyclohexane, (cyclopentylmethyl)-	4431-89-4	C12H22	166.303	256.85	Estimated; AW	879.7	Estimated	114.65	Estd. Psat		-42.7131	Estimated	451.85	QSPR	2453	QSPR
	Perhydrophenalene, (3a.alpha., 6a.alpha., 9a.alpha., 9b.beta.)-	40250-64-4	C13H22	178.313	254.85	Estimated; AW/NRRC	984.3	Estimated	98.45	Estd. Psat		-42.0057	Estimated 3	482.85	Joback	2478	Joback
	Tridecane	629-50-5	C13H28	184.361	235.466		759.81		92.35		-5.382	-44.057	Estimated	402.52		1679
	Cyclohexane, 1,1'-(1,2-ethanediyl)bis-	3321-50-4	C14H26	194.356	273.6	AW	879.9		113.15	Estd. Psat	11.44	-42.8183	Estimated 8	484.85	Joback	2099	AW
	1. Estimated using DfH(cis-decaline) = -219.5 kJ mol-1 and -29 kJ mol-1 increment per CH3. The increment is estimated using the values for cis and trans 1,3- and 1,4-dimethylcyclohexanes relative to methylcyclohexane
	2. Estimated using DfH(indane,l)=11.5 kJ mol-1 and the increment of -29 kJ mol-1 per methyl group
	3. ab initio + NIST ThermoData Engine (TDE) estimate for vaporization enthalpy
	4. Experimental value for the cis-isomer
	5. Experimental value for the trans-isomer
	6. Estimated using DfH(cis-bicyclo[3.3.0]octane) = -136.0 kJ mol-1 and the increment of -29 kJ mol-1 for the methyl group
	7. Available experimental value is not reliable and replaced with the estimate for CASRN 14398-72-2
	8. ab initio + experiment-based dvapH evaluated by TDE
	If no comment is provided for a value, it was evaluated by TDE using the available experimental data. See TDE [53] for a full list of references.
	Otherwise, the value was estimated.
	The densities were estimated using the Yamada-Gunn method [57].
	The net heats of combustion were found using the group-contribution procedure by Verevkin [59] unless specified otherwise.
	'Estimated' in the NBP column or 'Estd. Psat' in the Flash pt column indicate that no experimental data are available in the corresponding range.
	Specific methods are as follows:
	AW, Ambrose-Walton [67]
	CG, Constantinou-Gani [66]
	Joback [62]
	Marrero-Pardillo [63]
	NRRC, Nannoolal-Rarey-Ramjugernath-Cordes [68]
	QSPR, method described by Kazakov et al. [65]
	Wilson-Jasperson [64]
	The reference numbers correspond to those in the main text.
	REFPROP, the values recommended in the reference below.
	Lemmon, E.W., Bell, I.H., Huber, M.L., McLinden, M.O. NIST Standard Reference Database 23: Reference Fluid Thermodynamic and Transport Properties-REFPROP, Version 10.0, National Institute of Standards and Technology, Standard Reference Data Program, Gaithersburg, 2018. doi: https://doi.org/10.18434/T4/1502528
